# Supplementary material for: Metabolic, Perfusion, and Diffusion Imaging Enhance Diagnosis and Prognosis of H3K27-Altered Diffuse Midline Gliomas
Source: Research Square preprint supplement (doi:10.21203/rs.3.rs-5128033/v1), 2025-09-01
Supplement: Supplementary file 1 [file cf58f33d4dda0a2c508a654a.docx]

**SUPPLEMENTARY TABLES**

Table S1 MRI protocols of T1w, T2w, FLAIR and contrast-enhanced T1w

| Protocols | Sequence | FA (degree) | TR (ms) | TE (ms) | Acquisition voxel size (mm3) | In-plane acquisition matrix | Slice number | Acquisition time |
| --- | --- | --- | --- | --- | --- | --- | --- | --- |
| T1w | 3D TFE | 8 | 6.6 | 3 | 1×1×1 | 256×256 | 196 | 2min20s |
| T2w | 2D TSE | 90 | 2800 | 135 | 1×1×5 (gap 0.5mm) | 240×240 | 24 | 1min |
| T1C | 3D TFE | 8 | 6.6 | 3 | 1×1×1 | 256×256 | 196 | 2min20s |

Note: FA = flip angle; TR = repetition time; TE = echo time; IR = inversion recovery; TFE = turbo field echo; TSE = turbo spin echo; T1w = T1-weighted; T2w = T2-weighted; T1C = contrast-enhanced T1-weighted

Table S2 Univariatelogistic regression analysis for clinical and imaging parameters to differentiate *H3K27*-altered DMGs from non-DMGs patients

|  | **Univariate Analysis** | |
| --- | --- | --- |
|  | ***OR (95% CI)*** | ***p*** |
| Location |  | **<0.001*** |
| Pons | ref |  |
| Medulla | 0.59(0.11,4.23) | 0.522 |
| Midbrain | No events | 0.989 |
| Age | 0.97(0.94;1.00) | **0.040*** |
| Sex |  |  |
| male | ref |  |
| female | 0.93(0.34;2.40) | 0.877 |
| Enhancement |  |  |
| no | ref |  |
| yes | 1.04(0.38;2.71) | 0.932 |
| Necrosis |  |  |
| no | ref |  |
| yes | 0.78(0.30;2.00) | 0.605 |
| Hydrocephalus |  |  |
| no | ref |  |
| yes | 0.89(0.34;2.52) | 0.826 |
| KPS | 0.94(0.89;0.99) | **0.025*** |
| Volume | 1.06(1.01;1.12) | **0.010*** |
| APTw | 2.69(1.42;5.10) | **0.002*** |
| rCBF | 26.2(2.29;300) | **0.009*** |
| AD | 0.15(0.04;0.56) | **0.005*** |
| FA | 3.04(1.20;7.70) | **0.019*** |
| MD | 0.13(0.03;0.51) | **0.003*** |
| RD | 0.12(0.03;0.49) | **0.003*** |
| AK | 4.94(0.05;481) | 0.494 |
| MK | 1.00(0.02;39.8) | 0.998 |
| RK | 0.48(0.02;9.45) | 0.630 |

KPS = Karnofsky Performance Scale; WT = whole tumor; PE = peritumoral edema; TC = tumor core; APTw = amide proton transfer-weighted; rCBF = relative cerebral blood flow; FA = fractional anisotropy; MD = mean diffusivity; RD = radial diffusivity; AD = axial diffusivity; AK = axial kurtosis; MK = mean kurtosis; RK = radial kurtosis; ref = reference

Table S3 UnivariateROC analysis for clinical and imaging parameters to differentiate *H3K27*-altered DMGs from non-DMGs patients

| **Univariate ROC analysis** | | |
| --- | --- | --- |
|  | ***AUC*** | ***Cutoff*** |
| Location | 0.337 | NA |
| Age | 0.585 | 14.0 |
| Sex | 0.490 | NA |
| Enhancement | 0.504 | 0.5 |
| Necrosis | 0.531 | 0.5 |
| Hydrocephalus | 0.488 | NA |
| KPS | 0.349 | NA |
| Volume | 0.683 | 18.265 |
| APTw | 0.734 | 2.225 |
| rCBF | 0.707 | -0.311 |
| AD | 0.710 | 1.590 |
| FA | 0.666 | 0.199 |
| MD | 0.717 | 1.238 |
| RD | 0.722 | 1.150 |
| AK | 0.550 | 0.485 |
| MK | 0.514 | 0.531 |
| RK | 0.505 | 0.775 |

KPS = Karnofsky Performance Scale; APTw = amide proton transfer-weighted; rCBF = relative cerebral blood flow; FA = fractional anisotropy; MD = mean diffusivity; RD = radial diffusivity; AD = axial diffusivity; AK = axial kurtosis; MK = mean kurtosis; RK = radial kurtosis; NA = Not Available

Table S4 Performance of five models for Predicting *H3K27*-altered DMGs

| **Model** | **AUC** | **Accuracy** | **Sensitivity** | **Specificity** |
| --- | --- | --- | --- | --- |
| Model 1  (Clinical variable + conventional MRI) | 0.831 | 0.821 | 0.417 | 0.958 |
| Model 2  (Model 1+APTw) | 0.901 | 0.842 | 0.583 | 0.930 |
| Model 3  (Model 1+rCBF) | 0.881 | 0.853 | 0.667 | 0.915 |
| Model 4  (Model 1+DKI) | 0.904 | 0.852 | 0.583 | 0.944 |
| Model 5  (Model1+APTw  +rCBF+DKI) | 0.944 | 0.916 | 0.833 | 0.943 |

AUC = area under the curve; MRI = Magnetic resonance imaging; APTw = amide proton transfer-weighted; rCBF = relative cerebral blood flow; DKI = diffusion kurtosis imaging

Table S5 Performance of each imaging modality alone for Predicting *H3K27*-altered DMGs

| **Imaging Technique** | **AUC** | **Accuracy** | **Sensitivity** | **Specificity** |
| --- | --- | --- | --- | --- |
| APTw | 0.734 | 0.758 | 0.250 | 0.929 |
| rCBF | 0.707 | 0.779 | 0.208 | 0.972 |
| DKI (FA+MD) | 0.717 | 0.726 | 0.375 | 0.845 |

AUC = area under the curve; APTw = amide proton transfer-weighted; rCBF = relative cerebral blood flow; DKI = diffusion kurtosis imaging; FA = fractional anisotropy; MD = mean diffusivity

Table S6 Evaluation indicators for the five Cox models

| **Index** | **Model1** | **Model2** | **Model3** | **Model4** | **Model5** |
| --- | --- | --- | --- | --- | --- |
| C-index | 0.723 | 0.714 | 0.745 | 0.729 | 0.742 |

Table S7 Univariate Cox analysis of clinical and imaging features and OS

|  | **Univariate cox** | |
| --- | --- | --- |
|  | ***HR (95% CI)*** | ***p*** |
| Location |  |  |
| Pons | ref |  |
| Medulla | 0.73(0.26;2.03) | 0.540 |
| Age | 0.99(0.97;1.01) | 0.189 |
| Sex |  |  |
| male | ref |  |
| female | 1.42(0.78;2.59) | 0.249 |
| Enhancement |  |  |
| no | ref |  |
| yes | 1.34(0.75;2.41) | 0.323 |
| Necrosis |  |  |
| no | ref |  |
| yes | 2.95(1.64;5.32) | <0.001 |
| Hydrocephalus |  |  |
| no | ref |  |
| yes | 1.33(0.73;2.42) | 0.353 |
| EOR |  |  |
| Biopsy | ref |  |
| GTR | 0.43(0.19;0.98) | 0.045 |
| STR | 0.66(0.23;1.93) | 0.449 |
| PR | 0.82(0.42;1.60) | 0.570 |
| KPS | 0.99(0.97;1.00) | 0.061 |
| Volume | 1.03(1.01;1.05) | 0.011 |
| APTw | 2.06(1.46;2.91) | <0.001 |
| rCBF | 2.24(1.24;4.08) | 0.008 |
| FA | 0.03(0.00;3.54) | 0.154 |
| AD | 1.57(0.92;2.68) | 0.100 |
| MD | 1.57(0.89;2.78) | 0.121 |
| RD | 1.57(0.87;2.82) | 0.135 |
| AK | 0.09(0.01;1.29) | 0.075 |
| MK | 0.16(0.02;1.56) | 0.114 |
| RK | 0.26(0.04;1.67) | 0.155 |

EOR = extent of resection ; GTR = gross-total resection; STR = subtotal resection, PR = partial resection ; KPS = Karnofsky Performance Scale ; WT = whole tumor; PE = peritumoral edema; TC = tumor core; APTw = amide proton transfer-weighted; rCBF = relative cerebral blood flow; FA = fractional anisotropy; MD = mean diffusivity; RD = radial diffusivity; AD = axial diffusivity; AK = axial kurtosis; MK = mean kurtosis; RK = radial kurtosis; HR = Hazard ratio; CI = confidence interval; ref = reference

Table S8 Age information for all patients

| ID | sex | location | age | DMG |
| --- | --- | --- | --- | --- |
| 1 | male | pons | 10 | yes |
| 2 | female | pons | 5 | yes |
| 3 | female | pons | 11 | yes |
| 4 | female | pons | 57 | yes |
| 5 | male | pons | 5 | yes |
| 6 | male | pons | 10 | yes |
| 7 | female | pons | 9 | yes |
| 8 | male | pons | 28 | yes |
| 9 | male | pons | 4 | yes |
| 10 | male | pons | 13 | yes |
| 11 | female | pons | 32 | yes |
| 12 | female | medulla | 8 | yes |
| 13 | female | pons | 9 | yes |
| 14 | female | pons | 7 | yes |
| 15 | female | pons | 24 | yes |
| 16 | female | pons | 5 | yes |
| 17 | female | pons | 6 | yes |
| 18 | male | pons | 7 | yes |
| 19 | male | pons | 13 | yes |
| 20 | female | pons | 37 | yes |
| 21 | female | pons | 39 | yes |
| 22 | male | pons | 18 | yes |
| 23 | male | pons | 48 | yes |
| 24 | female | pons | 5 | yes |
| 25 | female | pons | 2 | yes |
| 26 | female | pons | 8 | yes |
| 27 | female | pons | 4 | yes |
| 28 | female | pons | 10 | yes |
| 29 | female | pons | 5 | yes |
| 30 | female | pons | 4 | yes |
| 31 | female | pons | 30 | yes |
| 32 | female | pons | 10 | yes |
| 33 | male | pons | 8 | yes |
| 34 | female | pons | 9 | yes |
| 35 | male | pons | 7 | yes |
| 36 | female | pons | 9 | yes |
| 37 | male | pons | 4 | yes |
| 38 | female | pons | 8 | yes |
| 39 | female | pons | 18 | yes |
| 40 | male | pons | 8 | yes |
| 41 | female | pons | 13 | yes |
| 42 | male | pons | 5 | yes |
| 43 | female | pons | 9 | yes |
| 44 | male | pons | 12 | yes |
| 45 | male | pons | 29 | yes |
| 46 | female | pons | 8 | yes |
| 47 | female | pons | 6 | yes |
| 48 | female | pons | 9 | yes |
| 49 | female | pons | 10 | yes |
| 50 | female | medulla | 56 | yes |
| 51 | male | medulla | 17 | yes |
| 52 | male | pons | 8 | yes |
| 53 | female | pons | 13 | yes |
| 54 | female | medulla | 17 | yes |
| 55 | male | pons | 15 | yes |
| 56 | female | pons | 12 | yes |
| 57 | male | pons | 20 | yes |
| 58 | male | medulla | 52 | yes |
| 59 | female | pons | 34 | yes |
| 60 | female | pons | 6 | yes |
| 61 | male | pons | 12 | yes |
| 62 | male | pons | 41 | yes |
| 63 | female | pons | 9 | yes |
| 64 | female | pons | 12 | yes |
| 65 | male | pons | 8 | yes |
| 66 | female | pons | 9 | yes |
| 67 | male | pons | 10 | yes |
| 68 | female | pons | 10 | yes |
| 69 | male | pons | 13 | yes |
| 70 | female | pons | 41 | yes |
| 71 | male | pons | 4 | yes |
| 72 | female | pons | 52 | no |
| 73 | male | pons | 30 | no |
| 74 | male | pons | 8 | no |
| 75 | female | pons | 24 | no |
| 76 | female | pons | 3 | no |
| 77 | male | pons | 5 | no |
| 78 | female | pons | 27 | no |
| 79 | female | midbrain | 51 | no |
| 80 | female | pons | 50 | no |
| 81 | female | pons | 48 | no |
| 82 | female | pons | 15 | no |
| 83 | male | pons | 8 | no |
| 84 | female | pons | 3 | no |
| 85 | female | midbrain | 5 | no |
| 86 | male | midbrain | 5 | no |
| 87 | male | midbrain | 42 | no |
| 88 | female | pons | 3 | no |
| 89 | male | pons | 6 | no |
| 90 | female | midbrain | 12 | no |
| 91 | male | medulla | 34 | no |
| 92 | male | pons | 19 | no |
| 93 | female | medulla | 32 | no |
| 94 | female | midbrain | 42 | no |
| 95 | female | midbrain | 15 | no |

DMG = *H3K27*-altered diffuse midline glioma

Table S9 Molecular information for all patients

| ID | DMG | Ki-67 | H3K27M | H3K27me3 | GFAP | Olig-2 | IDH | P53 | ATRX | BRAFV600E | MGMT |
| --- | --- | --- | --- | --- | --- | --- | --- | --- | --- | --- | --- |
| 1 | yes | 60 | + | - | + | + | - | + | + |  |  |
| 2 | yes | 60 | + |  |  |  |  | + | + |  |  |
| 3 | yes | 10 | + |  |  | + |  | + | - |  |  |
| 4 | yes | 30 | + | - | + | + | - | + | + |  |  |
| 5 | yes | 40 | + |  | + | + | - |  |  |  |  |
| 6 | yes | 30 | + |  | + | + | - |  |  |  | - |
| 7 | yes | 40 | + |  |  |  | - | + | + |  | - |
| 8 | yes | 30 | + | + | + | + | - | + | + |  |  |
| 9 | yes | 30 | + |  | + | + | - |  |  |  |  |
| 10 | yes | 20 | + |  | + | + | - | + | + |  |  |
| 11 | yes | 40 | + |  |  |  | - | + | + |  | - |
| 12 | yes | 30 | + |  | + | + | - |  |  | + | + |
| 13 | yes | 15 | + | + | + | + | - | + | + | - |  |
| 14 | yes | 20 | + |  |  |  |  |  |  |  |  |
| 15 | yes | 30 | + |  | + | + | - |  |  |  |  |
| 16 | yes | 50 | + |  |  | + | - | + | + |  |  |
| 17 | yes | 60 | + |  | + | + |  | + | + |  |  |
| 18 | yes | 40 | + | - | + | + | - | + | + |  |  |
| 19 | yes | 10 | + | - | + | + |  |  | - | - |  |
| 20 | yes | 40 | + |  | + | + | - |  |  |  | - |
| 21 | yes | 30 | + |  |  |  | - | + | + |  | - |
| 22 | yes | 60 | + | - | + | + | - | + | - |  | + |
| 23 | yes | 20 | + |  |  |  | - | + | + |  |  |
| 24 | yes | 70 | + | - | + | + |  |  |  |  |  |
| 25 | yes | 60 | + |  |  |  | - | + | + |  | + |
| 26 | yes | 30 | + |  | + | + |  | + | - |  |  |
| 27 | yes | 5 | + |  | - | + | - |  |  |  |  |
| 28 | yes | 50 | + |  | + | + |  |  |  |  |  |
| 29 | yes | 50 | + |  |  |  | - | + | + | + | - |
| 30 | yes | 10 | + |  |  | + |  |  |  |  |  |
| 31 | yes | 40 | + | - | + | + | - | + | + |  |  |
| 32 | yes | 50 | + | - | + | + | - | + |  |  |  |
| 33 | yes | 60 | + | - | + | + | - | + | + |  |  |
| 34 | yes | 50 | + | - | + | + | - | + | + |  |  |
| 35 | yes | 30 | + |  | + | + |  | + | + |  |  |
| 36 | yes | 60 | + |  |  |  | - | + | + |  |  |
| 37 | yes | 40 | + |  | + | + | - |  |  |  | + |
| 38 | yes | 60 | + |  | + | + |  |  |  |  |  |
| 39 | yes | 20 | + |  | + | + | - |  |  |  |  |
| 40 | yes | 40 | + |  | + | + |  | - | - |  |  |
| 41 | yes | 50 | + |  |  |  | - | - | + |  | - |
| 42 | yes | 60 | + |  | + | + |  | + |  |  |  |
| 43 | yes | 30 | + | - | + | + | - | + | + |  | + |
| 44 | yes | 50 | + |  |  |  |  | + | - |  |  |
| 45 | yes | 30 | + | + | + | + | - | + | + |  | + |
| 46 | yes | 20 | + |  | + | + | - |  | - |  | - |
| 47 | yes | 50 | + | - | + | + |  |  |  |  |  |
| 48 | yes | 25 | + |  |  |  | - | + | + |  |  |
| 49 | yes | 15 | + | - | + | + | - | + | + |  |  |
| 50 | yes | 30 | + |  | + | + | - |  |  |  |  |
| 51 | yes | 20 | + |  | + |  | - |  |  |  |  |
| 52 | yes | 50 | + | - |  |  | - | + | + |  |  |
| 53 | yes | 40 | + | - | + | + | - | + | + |  |  |
| 54 | yes | 40 | + | - | + | + | - | + | + |  |  |
| 55 | yes | 25 | + | - | + | + | - | + | + |  |  |
| 56 | yes | 15 | + | - | + | + | - | + | + |  |  |
| 57 | yes | 30 | + | - | + | + | - | + | - |  |  |
| 58 | yes | 10 | + | - | + | + | - |  |  |  |  |
| 59 | yes | 25 | + |  | + | + | - |  |  |  |  |
| 60 | yes | 50 | + |  | + | + |  |  |  |  |  |
| 61 | yes | 20 | + |  | + | + |  | + |  |  |  |
| 62 | yes | 40 | + | + | + | + | - | + | + |  | + |
| 63 | yes | 60 | + |  | + | + | - | + | + |  |  |
| 64 | yes | 12 | + | + | + | + | - | + | - |  |  |
| 65 | yes | 20 | + |  |  |  | - |  |  |  |  |
| 66 | yes | 50 | + |  | + | + | - |  |  |  |  |
| 67 | yes | 5 | + | + | + | + | - | + |  |  |  |
| 68 | yes | 70 | + | - | + | + | - | + | + |  |  |
| 69 | yes | 30 | + |  | + | + | - |  |  |  |  |
| 70 | yes | 10 | + | - | + | + | - | - | + |  |  |
| 71 | yes | 8 | + |  |  | + |  |  |  |  |  |
| 72 | no | 1 | - |  | + | + | + |  |  | - |  |
| 73 | no | 30 | - |  |  |  | - | + | + |  | - |
| 74 | no | 40 | - | + | + | + | + |  |  |  |  |
| 75 | no | 80 | - |  | + | - | - |  |  |  |  |
| 76 | no | 3 | - | + | + | + | + | + |  |  |  |
| 77 | no | 3 | - | + | + | + | - |  |  |  |  |
| 78 | no | 15 | - | + | + | + | + | + | - |  |  |
| 79 | no | 5 | - |  | + | + | + |  |  |  |  |
| 80 | no | 10 | - |  | + | + | + | + | + |  | + |
| 81 | no | 10 | - |  | + | + | + |  |  |  |  |
| 82 | no | 2 | - |  | + | + | - | - | + | - |  |
| 83 | no | 5 | - | + | + | + | - |  |  |  |  |
| 84 | no | 5 | - | + | + |  |  | + | + |  |  |
| 85 | no | 6 | - | + | + |  | - |  |  | - |  |
| 86 | no | 5 | - | + | + |  | - | - | + | - |  |
| 87 | no | 30 | - |  | + |  | + |  |  |  | - |
| 88 | no | 7 | - | + | + | + | - | + | + | - |  |
| 89 | no | 3 | - | + | + |  | - | + | + |  |  |
| 90 | no | 3 | - | + | + | + | - | - | + |  |  |
| 91 | no | 10 | - |  | + | + | + |  |  |  |  |
| 92 | no | 5 | - | + | + | + | + | - | + |  |  |
| 93 | no | 1 | - |  | + | + | - |  |  | - |  |
| 94 | no | 1 | - |  | + | + | - | - |  | + |  |
| 95 | no | 1 | - | + | + | + |  | - |  | + |  |

DMG = *H3K27*-altered diffuse midline glioma

**SUPPLEMENTARY FIGURES**

**
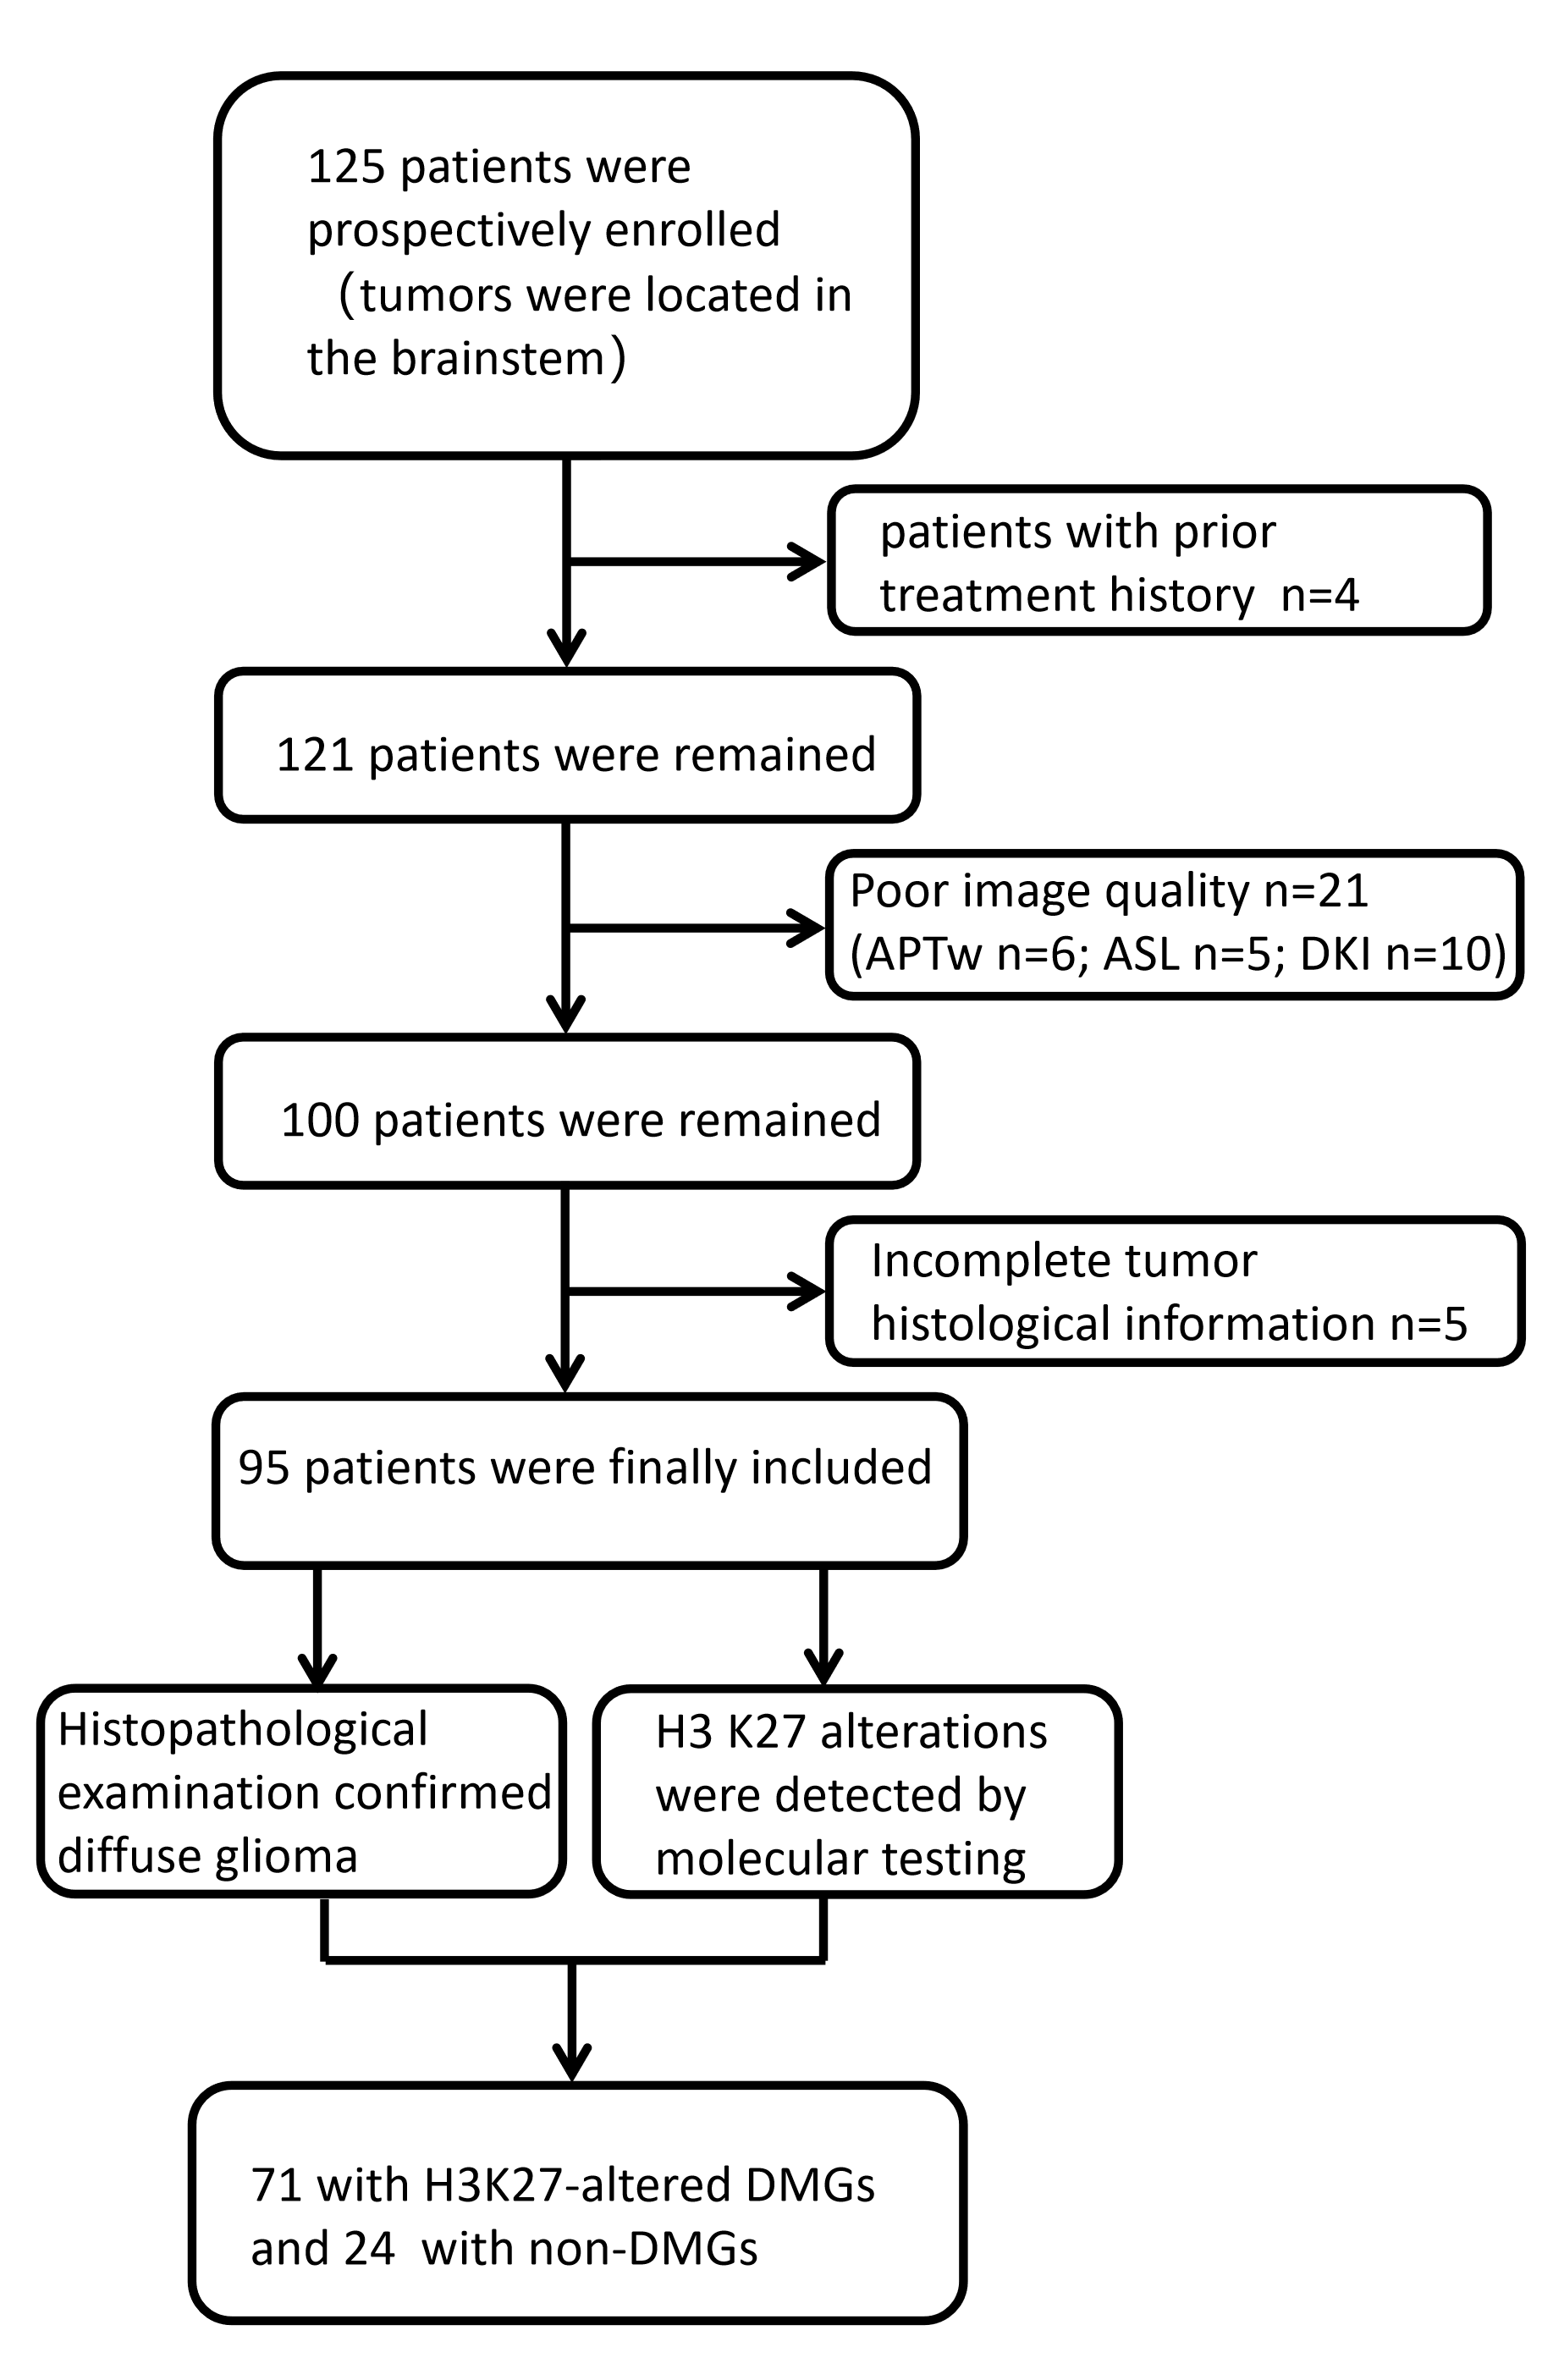
**

Fig. S1 the flowchart of this study


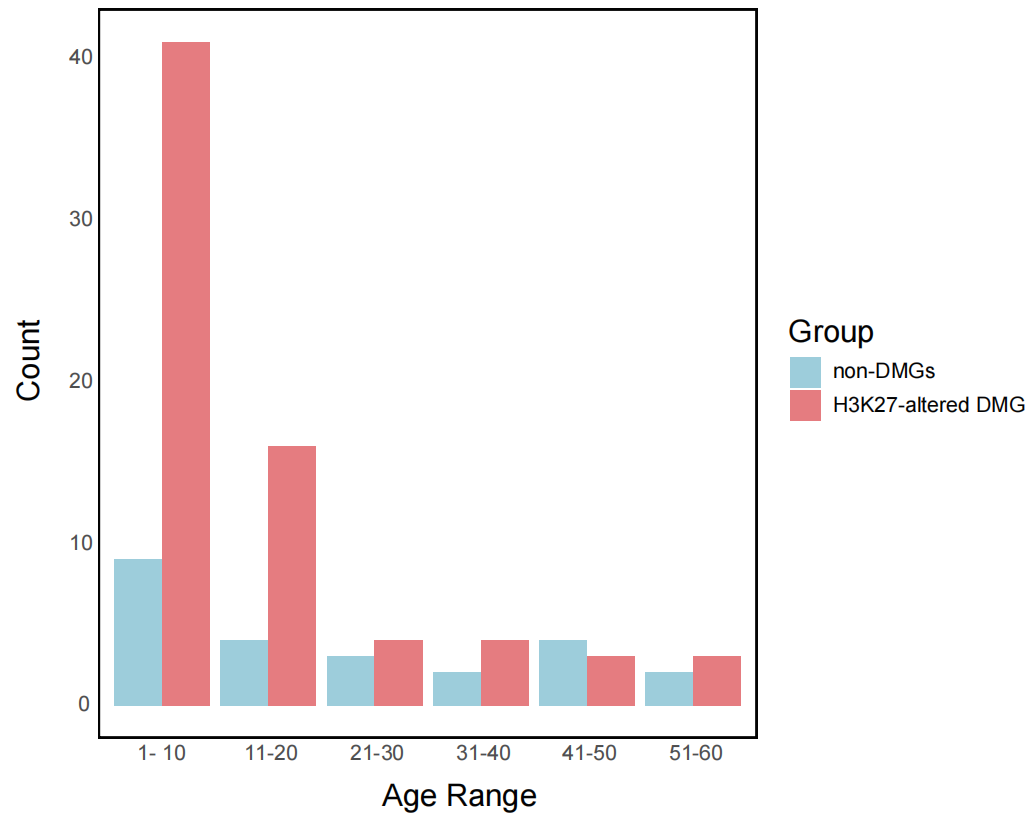


Fig. S2 Patient Age Distribution Chart

**
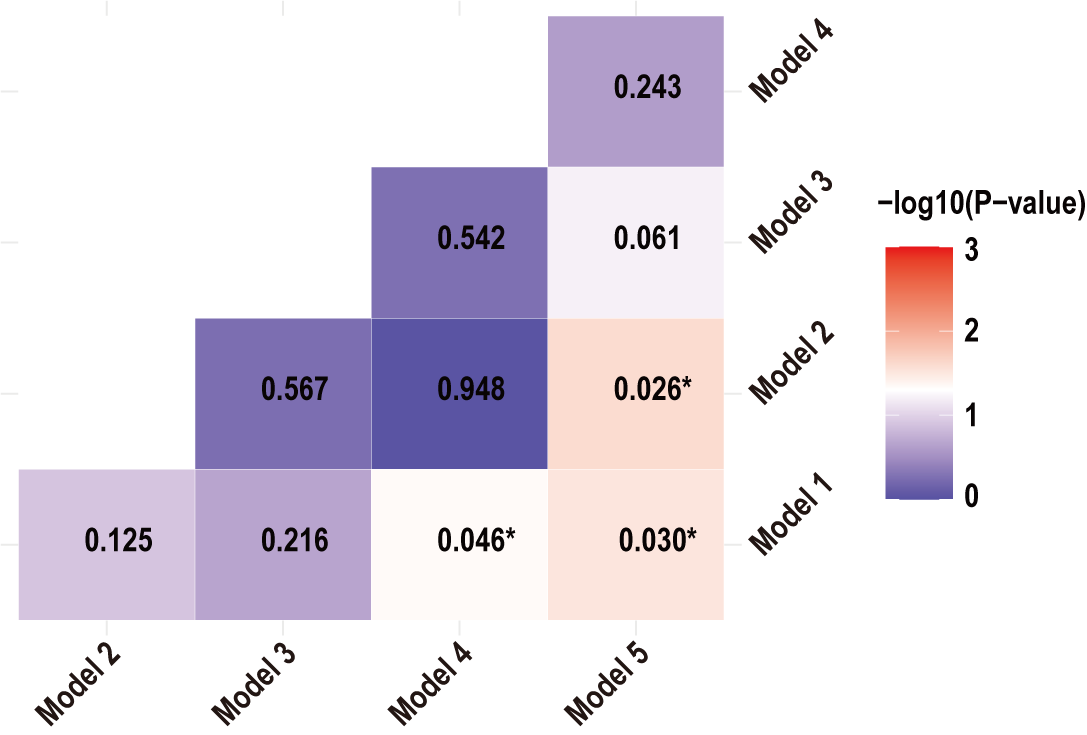
**

Fig. S3 The Delong test of the five multivariable models. * indicate P < 0.05


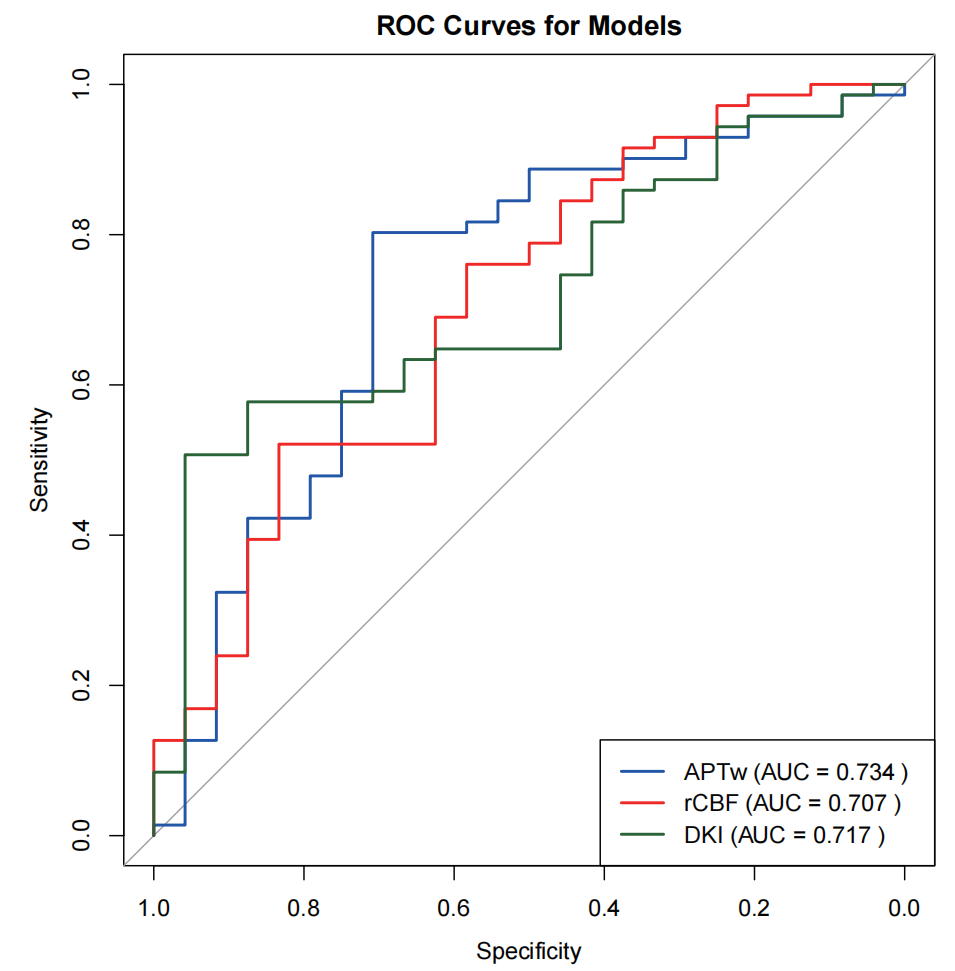


Fig. S4 The ROC curves for each imaging modality alone


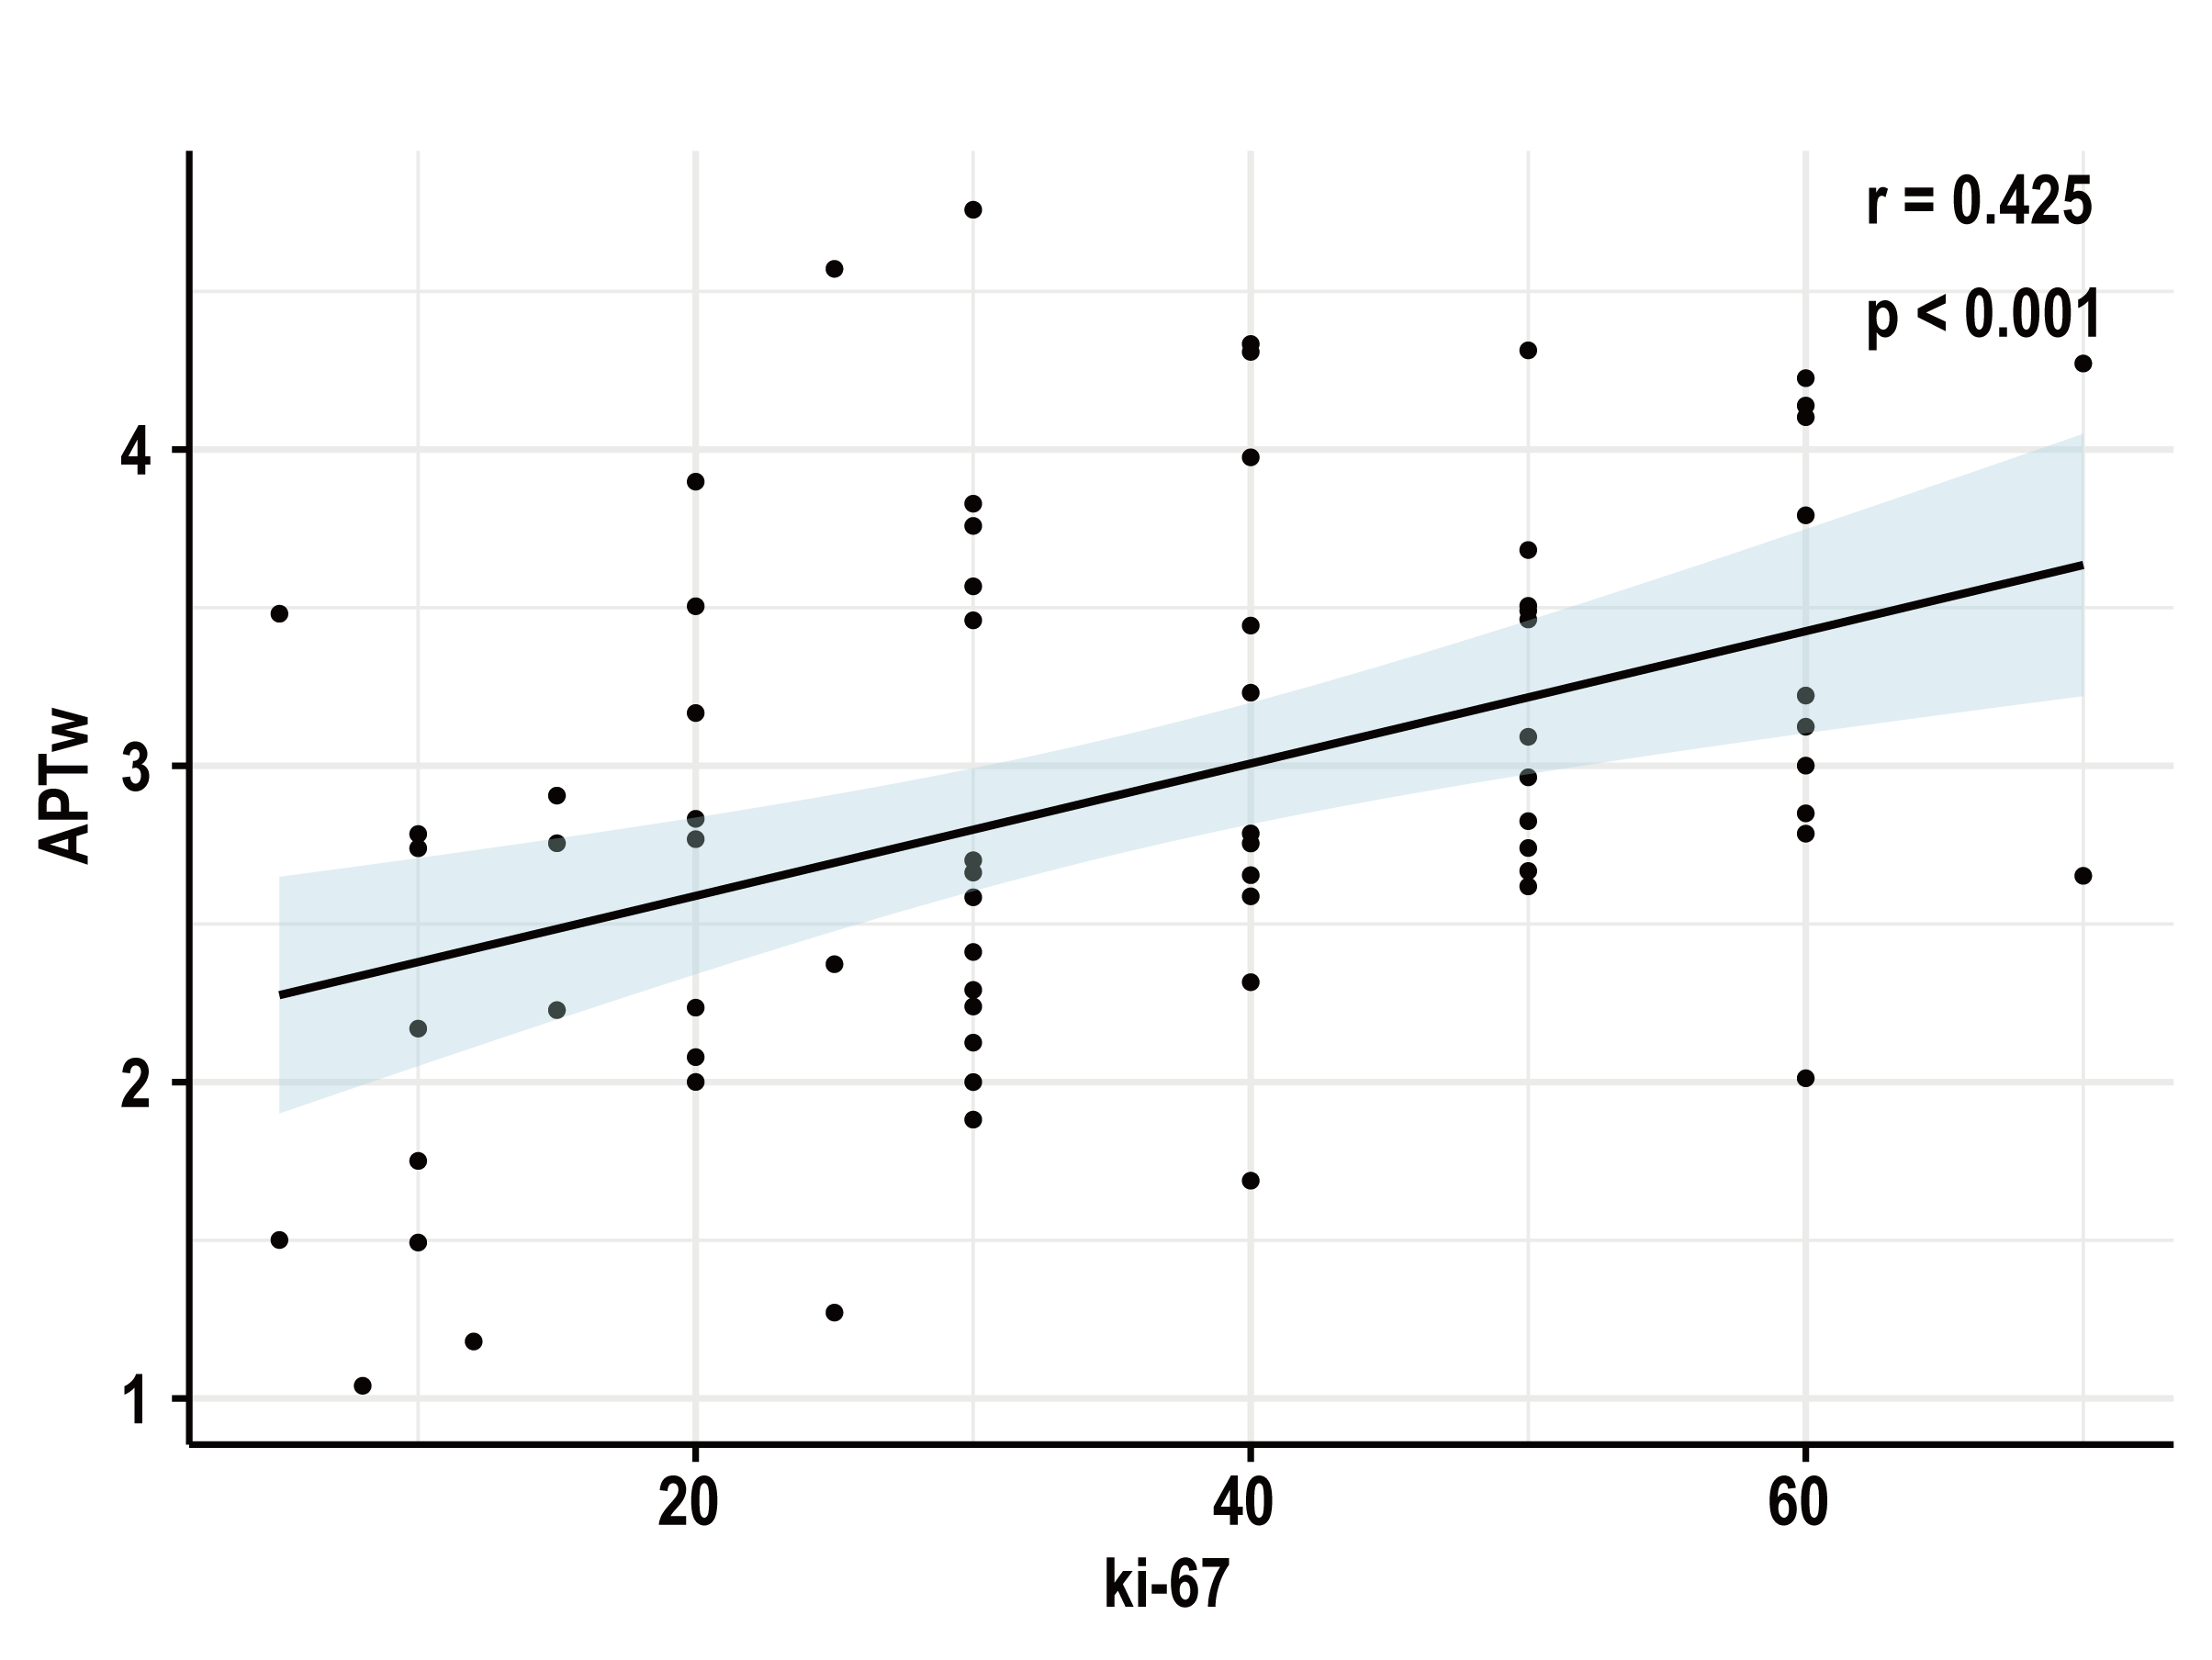


Fig. S5 The scatter diagram between Ki-67 and APTw. APTw = amide proton transfer-weighted
